# Supplementary material
Source: PubMed Central journal article supplement (PMC5876043)

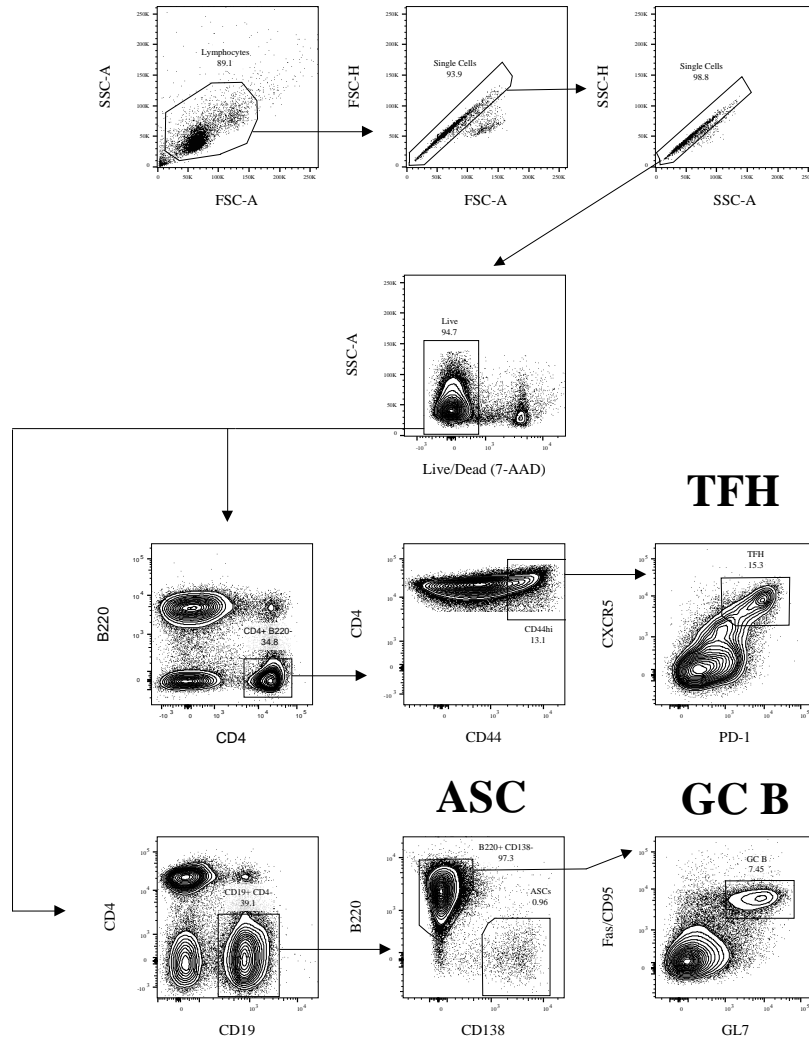

Supplement: NIHMS840639-supplement.pdf [file NIHMS840639-supplement.pdf]
